# Supplementary material
Source: PubMed Central journal article supplement (PMC7255214)
Supplement: mmc1.pdf [file mmc1.pdf]

# THE LANCET

## Supplementary appendix

This appendix formed part of the original submission and has been peer reviewed. We post it as supplied by the authors.

Supplement to: de Abajo FJ, Rodríguez-Martín S, Lerma V, et al. Use of renin-angiotensin-aldosterone system inhibitors and risk of COVID-19 requiring admission to hospital: a case-population study. *Lancet* 2020; published online May 14. [http://dx.doi.org/10.1016/S0140-6736\(20\)31030-8](http://dx.doi.org/10.1016/S0140-6736(20)31030-8).

## **APPENDIX**

### **USE OF RENIN-ANGIOTENSIN-ALDOSTERONE SYSTEM INHIBITORS AND RISK OF COVID-19 REQUIRING ADMISSION TO HOSPITAL: A CASE- POPULATION STUDY**

Francisco J. de Abajo<sup>1,2</sup>, Sara Rodríguez-Martín<sup>1,2</sup>, Victoria Lerma<sup>1</sup>, Gina Mejía-Abril<sup>3</sup>,  
Mónica Aguilar<sup>4</sup>, Amelia García-Luque<sup>5,2</sup>, Leonor Laredo<sup>6</sup>, Olga Laosa<sup>7,8</sup>, Gustavo A.  
Centeno-Soto<sup>9</sup>, M<sup>a</sup>Ángeles Gálvez<sup>4</sup>, Miguel Puerro<sup>5,2</sup>, Esperanza González-Rojano<sup>6</sup>,  
Laura Pedraza<sup>10</sup>, Itziar de Pablo<sup>4</sup>, Francisco Abad-Santos<sup>3</sup>, Leocadio Rodríguez-  
Mañas<sup>7,8</sup>, Miguel Gil<sup>11</sup>, Antonio Rodríguez-Miguel<sup>1</sup>, Diego Rodríguez-Puyol<sup>12,13</sup> on  
behalf of the MED-ACE2-COVID19 study group

1. Clinical Pharmacology Unit. University Hospital Príncipe de Asturias. Alcalá de Henares. Madrid. Spain
2. Department of Biomedical Sciences (Pharmacology Section). University of Alcalá (IRYCIS). Alcalá de Henares. Madrid. Spain
3. Clinical Pharmacology Department, University Hospital La Princesa, Teófilo Hernando Institute, Autonomous University of Madrid, Institute of Health La Princesa (IP), Madrid, Spain.
4. Clinical Pharmacology Unit. University Hospital Ramón y Cajal (IRYCIS). Madrid. Spain
5. Department of Clinical Pharmacology. Defense Central Hospital. Madrid. Spain
6. Department of Clinical Pharmacology, Clinic Hospital San Carlos, Department of Pharmacology and Toxicology, Complutense University of Madrid (IdISSC), Madrid, Spain.
7. Department of Geriatric. University Hospital of Getafe. Getafe. Madrid. Spain
8. Centre of Network Biomedical Research on Frailty and Healthy Ageing (CIBERFES), Institute of Health Carlos III
9. Clinical Pharmacology Department. University Hospital Puerta de Hierro. Majadahonda. Madrid. Spain
10. Institute of Biomedical Research, University Hospital of Getafe
11. Division of Pharmacoepidemiology and Pharmacovigilance. Spanish Agency for Medicines and Medical Devices. Madrid. Spain
12. Department of Nephrology. University Hospital Príncipe de Asturias. Alcalá de Henares. Madrid. Spain
13. Department of Medicine. University of Alcalá (IRYCIS). Alcalá de Henares. Madrid. Spain

## Appendix p 2: Distribution of hospitals taking part in the study

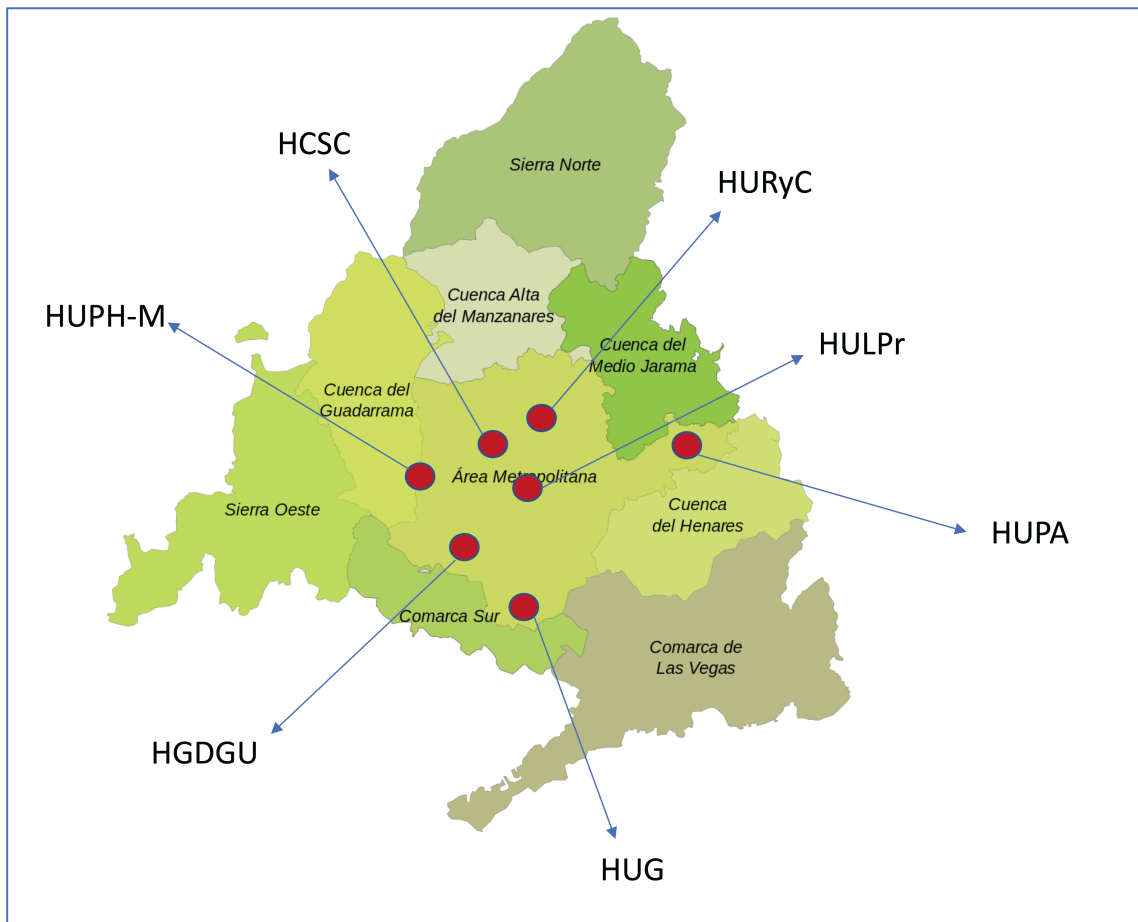

- HURyC: Hospital Universitario Ramón y Cajal (Madrid)  
HULPr: Hospital Universitario de La Princesa (Madrid)  
HUPA: Hospital Universitario Príncipe de Asturias (Alcalá de Henares)  
HUG: Hospital Universitario de Getafe (Getafe)  
HGDGU: Hospital General de la Defensa "Gómez Ulla" (Madrid)  
HUPH-M: Hospital Universitario Puerta de Hierro (Majadahonda)  
HCSC: Hospital Clínico San Carlos (Madrid)

**Appendix pp 3-4. Distribution by age and gender of BIFAP patients from Madrid (BIFAP-MADRID) as compared to Madrid population census (MADRID).**

**Both genders**

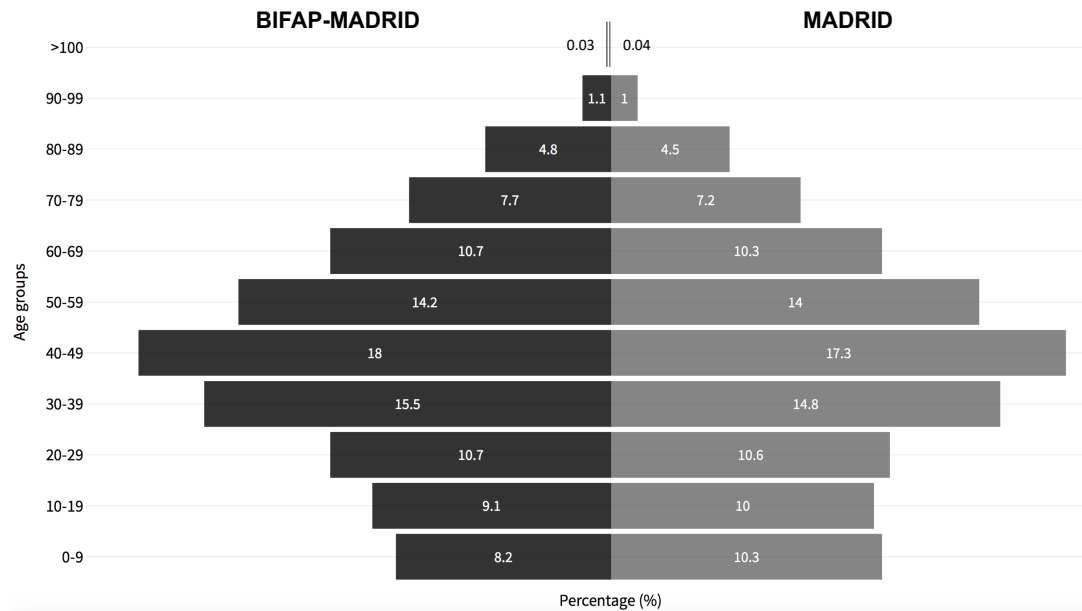

**Males**

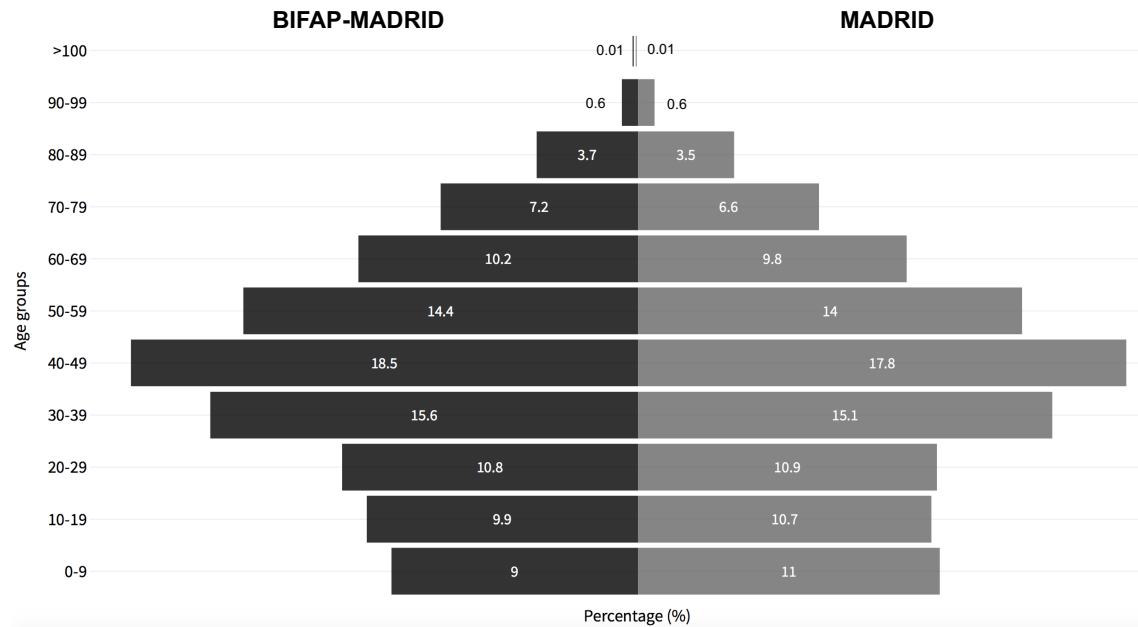

**Appendix pp 3-4 (continued). Distribution by age and gender of BIFAP patients from Madrid (BIFAP-MADRID) as compared to Madrid population census (MADRID).**

**Females**

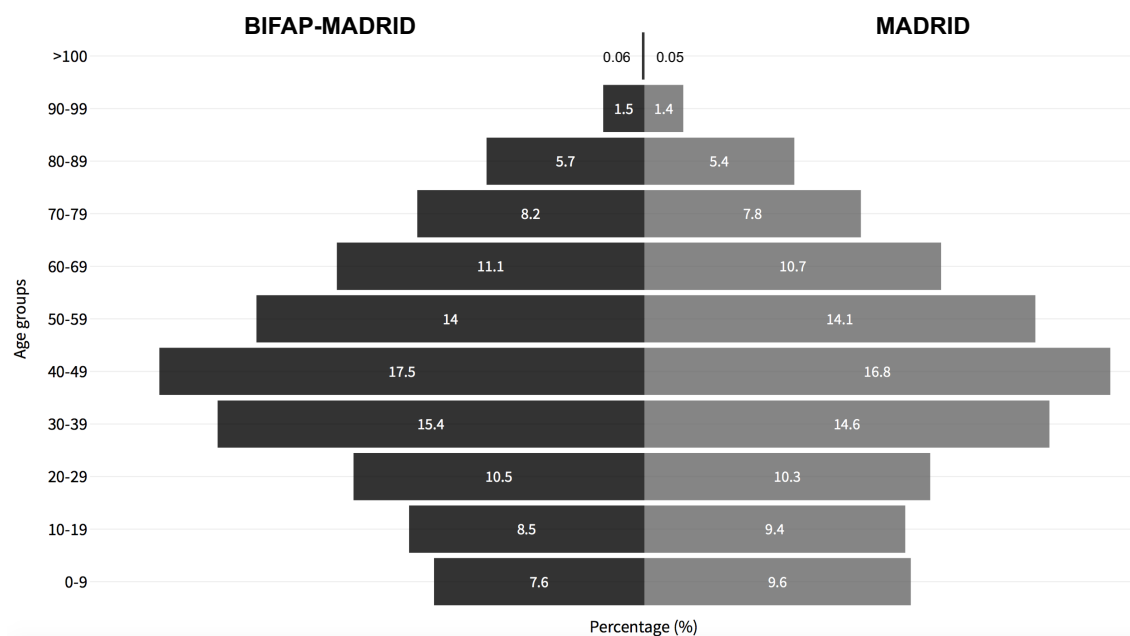

**Appendix pp 5-7: Trends of use prevalence of different antihypertensive subgroups. It is shown the forecasted values for 2019 and 2020, as well as the ratio 2020/2018 (used as correction factor). Data are shown in number of users per 10,000 patients with records in BIFAP.**

### RENIN-ANGIOTENSIN SYSTEM BLOCKERS (RAS)

Method: Linear ; R2 = 0.79

Correction Factor (2020 / 2018) = 1.04

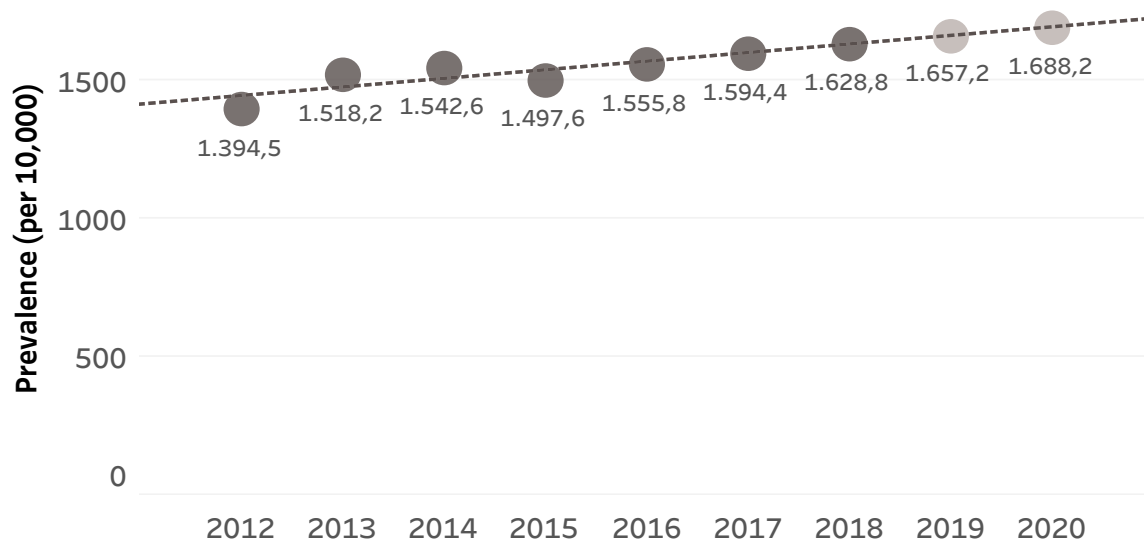

### OTHER ANTIHYPERTENSIVE DRUGS

Method: Linear ; R2 = 0.01

Correction Factor (2020 / 2018) = 1.01

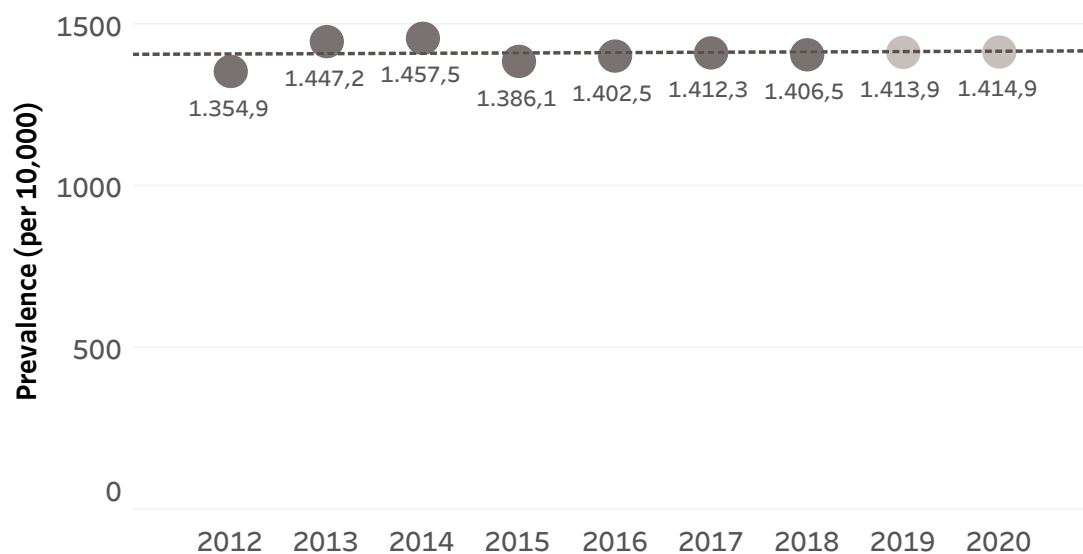

**Appendix pp 5-7 (continued): Trends of use prevalence of different antihypertensive subgroups. It is shown the forecasted values for 2019 and 2020, as well as the ratio 2020/2018 (used as correction factor). Data are shown in number of users per 10,000 patients with records in BIFAP.**

### ANGIOTENSIN CONVERTING ENZYME INHIBITORS (ACEI)

Method: Linear ; R2 = 0.83

Correction Factor (2020 / 2018) = 1.05

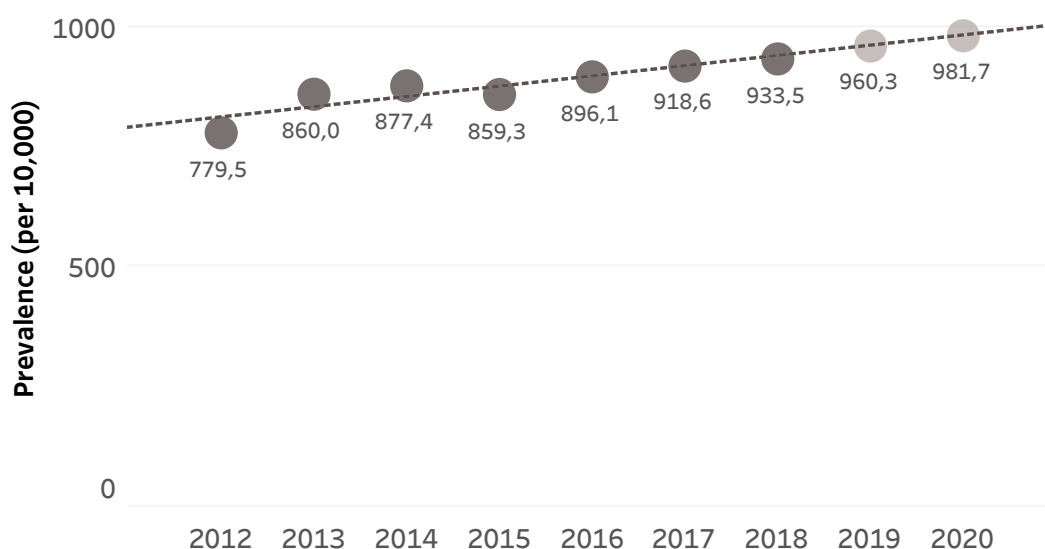

### ANGIOTENSIN RECEPTOR BLOCKERS (ARB)

Method: Linear ; R2 = 0.58

Correction Factor (2020 / 2018) = 1.01

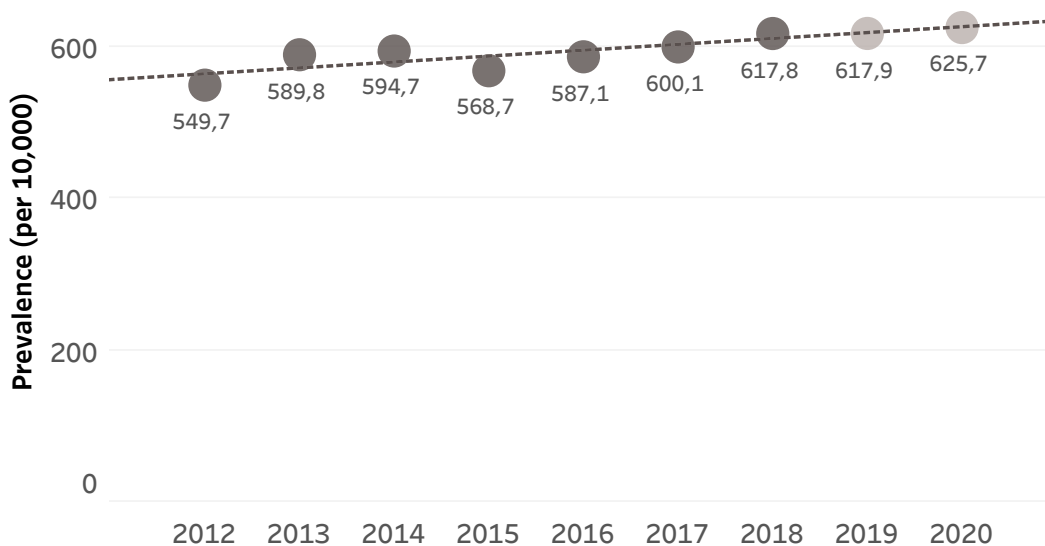

**Appendix pp 5-7 (continued): Trends of use prevalence of different antihypertensive subgroups. It is shown the forecasted values for 2019 and 2020, as well as the ratio 2020/2018 (used as correction factor). Data are shown in number of users per 10,000 patients with records in BIFAP.**

**ALDOSTERONE ANTAGONISTS (AA)**

Method: Linear ; R2 = 0.92

Correction Factor (2020 / 2018) = 1.09

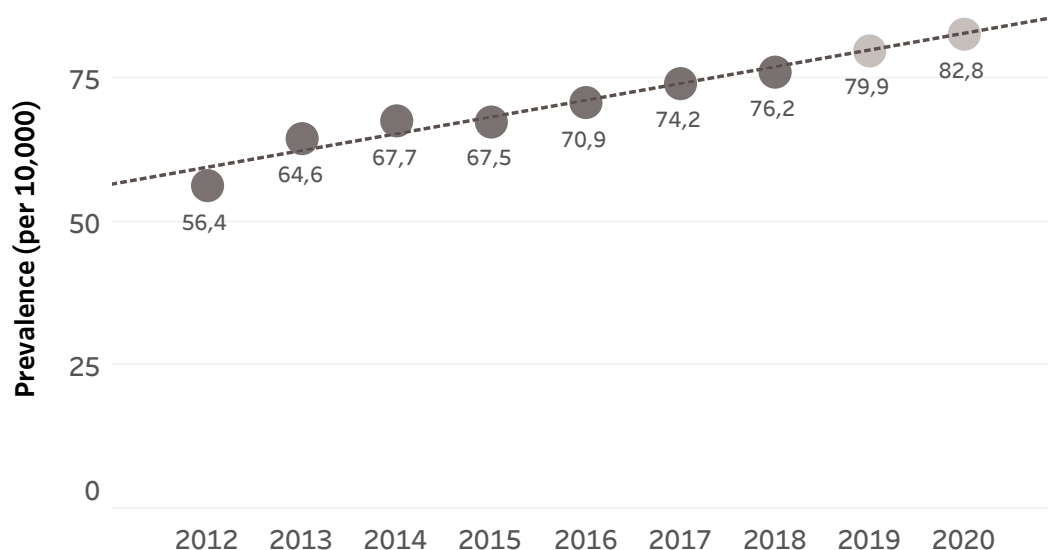

**CALCIUM CHANNEL BLOCKERS (CCB)**

Method: Linear ; R2 = 0.01

Correction Factor (2020 / 2018) = 1.0

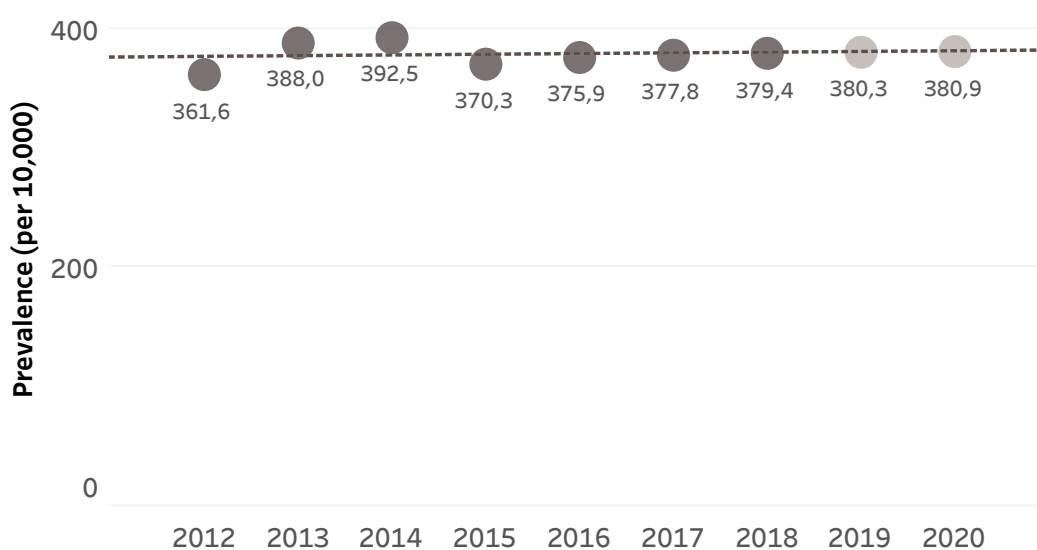



**Appendix p 8: Antihypertensive drugs included in the study and their respective ATC codes.**

| <b>Antihypertensive drugs</b>    | <b>ATC codes</b>                                                                                                                                                  |
|----------------------------------|-------------------------------------------------------------------------------------------------------------------------------------------------------------------|
| ACE inhibitors                   | C09AA, C09B, C10BX04, C10BX06, C10BX07, C10BX11, C10BX12, C10BX13, C10BX14, C10BX15, C10BX17.                                                                     |
| Angiotensin II receptor blockers | C09CA, C09D, C10BX10, C10BX16                                                                                                                                     |
| Renin inhibitors                 | C09X, C09DX02                                                                                                                                                     |
| Aldosterone antagonists          | C03DA, C03EA04, C03EA06, C03EA13                                                                                                                                  |
| Calcium channel blockers         | C08, C07FB, C09BB, C09BX01, C09BX03, C09BX04, C09DB, C09DX01, C09DX03, C09DX06, C09DX07, C09XA53, C09XA54, C10BX03, C10BX07, C10BX09, C10BX11, C10BX14            |
| Diuretics                        | C03A, C03B, C03C, C03DB, C03E, C03X, C02L, C07B, C07C, C07D, C08GA, C09BA, C09BX01, C09BX03, C09DA, C09DX01, C09DX03, C09DX06, C09DX07, C09XA52, C09XA54, C10BX13 |
| Beta-blocking agents             | C07A, C07B, C07C, C07D, C07E, C07F, C09BX02, C09BX04, C09DX05                                                                                                     |
| Alpha-blockers                   | C02CA                                                                                                                                                             |

**Appendix p 9. Risk of COVID-19 requiring hospital admission and current use of Renin-Angiotensin-Aldosterone System (RAAS) inhibitors as compared to non-use of any antihypertensive drug.**

| Antihypertensive drug use             | Cases (%)<br>N=1139 | Controls (%)<br>N=11390 | Crude OR* (95%CI) | Adjusted OR** (95%CI) |
|---------------------------------------|---------------------|-------------------------|-------------------|-----------------------|
| Non-use                               | 487 (42.8)          | 6439 (56.5)             | 1 (Ref.)          | 1 (Ref.)              |
| <b>Current use of RAAS inhibitors</b> | 497 (43.6)          | 3822 (33.6)             | 1.99 (1.72-2.31)  | 1.71 (1.46-2.01)      |
| <i>ACEIs</i>                          | 240 (21.1)          | 2192 (19.2)             | 1.68 (1.41-2.00)  | 1.47 (1.22-1.77)      |
| Monotherapy                           | 82 (7.2)            | 757 (6.7)               | 1.61 (1.25-2.08)  | 1.54 (1.19-1.99)      |
| Combinations                          | 158 (13.9)          | 1435 (12.6)             | 1.72 (1.40-2.10)  | 1.44 (1.16-1.79)      |
| <i>ARBs</i>                           | 237 (20.8)          | 1552 (13.6)             | 2.36 (1.98-2.83)  | 2.02 (1.67-2.44)      |
| Monotherapy                           | 38 (3.3)            | 328 (2.9)               | 1.76 (1.23-2.51)  | 1.61 (1.12-2.31)      |
| Combinations                          | 199 (17.5)          | 1224 (10.8)             | 2.54 (2.10-3.07)  | 2.13 (1.73-2.61)      |
| <i>AAs</i>                            | 19 (1.7)            | 71 (0.6)                | 4.38 (2.59-7.39)  | 3.10 (1.80-5.34)      |
| <i>RIs</i>                            | 1 (0.1)             | 7 (0.1)                 | 2.32 (0.28-18.90) | 1.92 (0.23-15.84)     |
| <b>Current use of OADs</b>            | 155 (13.6)          | 1129 (9.9)              | 2.13 (1.73-2.61)  | 1.82 (1.47-2.26)      |
| <i>CCBs</i>                           | 55 (4.8)            | 372 (3.3)               | 2.29 (1.69-3.12)  | 1.96 (1.43-2.69)      |
| <i>Diuretics</i>                      | 60 (5.3)            | 442 (3.9)               | 2.12 (1.57-2.85)  | 1.79 (1.32-2.43)      |
| <i>BBAs</i>                           | 37 (3.3)            | 293 (2.6)               | 1.93 (1.35-2.77)  | 1.68 (1.16-2.43)      |
| <i>ABs</i>                            | 3 (0.3)             | 22 (0.2)                | 2.11 (0.62-7.16)  | 1.96 (0.57-6.71)      |

\* Crude OR actually means adjusted only for the matching variables.

\*\* Adjusted for the matching variables plus antecedents of diabetes, dyslipidaemia, ischaemic heart disease, heart failure, atrial fibrillation, thromboembolic disease, cerebrovascular accident, chronic obstructive pulmonary disease, asthma, cancer and chronic renal failure

**Abbreviations:** AAs: Antagonists of aldosterone; ACEIs: Angiotensin-converting enzyme inhibitors; ABs: Alpha-blockers; ARBs: Angiotensin II receptor blockers; BBAs: Beta-blocking agents; CCBs: Calcium-channel blockers; OADs: Other antihypertensive drugs; OR: Odds ratio; RAAS: Renin-Angiotensin-Aldosterone System; RIs: Renin inhibitors.

**Note:** In this table, the different pharmacological classes examined are mutually exclusive categories, so that patients who used combinations are counted only once, applying the following criteria: ACEIs includes current users of any angiotensin converting enzyme inhibitor, alone or combined with any other antihypertensive drug (in fixed-dose combinations or in different medicinal products); ARBs includes current users of any angiotensin II receptor blocker (ARB), alone or combined with any other antihypertensive drug different from ACEIs (in fixed-dose combinations or in different medicinal products); AAs includes current users of any antagonist of aldosterone, alone or combined with any other antihypertensive drug different from ACEIs and ARBs (in fixed-dose combinations or in different medicinal products); OADs includes calcium channel blockers, diuretics, beta-blockers, and alpha-blockers, alone or combined (excluding RAAS inhibitors, either in fixed-dose combinations or in different medicinal products).

**Appendix p 10. Risk of COVID-19 requiring hospital admission and current use of Renin-Angiotensin-Aldosterone System (RAAS) inhibitors as compared to current use of Calcium Channel Blockers (CCBs).**

|                                       | Cases (%)<br>N=1139 | Controls (%)<br>N=11390 | Crude OR         | Adjusted OR*     |
|---------------------------------------|---------------------|-------------------------|------------------|------------------|
| <b>Current use of OADs</b>            | 155 (13.6)          | 1129 (9.9)              | ..               | ..               |
| <i>CCBs</i>                           | 55 (4.8)            | 372 (3.3)               | 1 (Ref.)         | 1 (Ref.)         |
| <i>Diuretics</i>                      | 60 (5.3)            | 442 (3.9)               | 0.92 (0.62-1.37) | 0.91 (0.61-1.36) |
| <i>Beta-blocking agents</i>           | 37 (3.3)            | 293 (2.6)               | 0.84 (0.54-1.32) | 0.86 (0.55-1.34) |
| <i>Alpha-blockers</i>                 | 3 (0.3)             | 22 (0.2)                | 0.92 (0.26-3.20) | 1.00 (0.29-3.52) |
| <b>Current use of RAAS inhibitors</b> | 497 (43.6)          | 3822 (33.6)             | 0.87 (0.64-1.17) | 0.87 (0.65-1.18) |
| <i>ACEIs</i>                          | 240 (21.1)          | 2192 (19.2)             | 0.73 (0.53-0.99) | 0.74 (0.54-1.02) |
| Monotherapy                           | 82 (7.2)            | 757 (6.7)               | 0.70 (0.48-1.00) | 0.78 (0.54-1.13) |
| Combinations                          | 158 (13.9)          | 1435 (12.6)             | 0.74 (0.53-1.03) | 0.73 (0.52-1.01) |
| <i>ARBs</i>                           | 237 (20.8)          | 1552 (13.6)             | 1.02 (0.75-1.40) | 1.02 (0.74-1.40) |
| Monotherapy                           | 38 (3.3)            | 328 (2.9)               | 0.76 (0.49-1.18) | 0.81 (0.52-1.27) |
| Combinations                          | 199 (17.5)          | 1224 (10.8)             | 1.09 (0.79-1.51) | 1.07 (0.77-1.49) |
| <i>AAs</i>                            | 19 (1.7)            | 71 (0.6)                | 1.90 (1.06-3.39) | 1.57 (0.86-2.84) |
| <i>RIs</i>                            | 1 (0.1)             | 7 (0.1)                 | 1.00 (0.12-8.30) | 0.97 (0.12-8.12) |
| <b>Non-use</b>                        | 487 (42.8)          | 6439 (56.5)             | 0.44 (0.32-0.59) | 0.51 (0.37-0.70) |

\* Crude OR actually means adjusted only for the matching variables.

\*\* Adjusted for the matching variables plus antecedents of diabetes, dyslipidaemia, ischaemic heart disease, heart failure, atrial fibrillation, thromboembolic disease, cerebrovascular accident, chronic obstructive pulmonary disease, asthma, cancer and chronic renal failure.

**Abbreviations:** AAs: Antagonists of aldosterone; ACEIs: Angiotensin-converting enzyme inhibitors; ABs: Alpha-blockers; ARBs: Angiotensin II receptor blockers; BBAs: Beta-blocking agents; CCBs: Calcium-channel blockers; OADs: Other antihypertensive drugs; OR: Odds ratio; RAAS: Renin-Angiotensin-Aldosterone System; RIs: Renin inhibitors.

**Note:** In this table, the different pharmacological classes examined are mutually exclusive categories, so that patients who used combinations are counted only once, applying the following criteria: ACEIs includes current users of any angiotensin converting enzyme inhibitor, alone or combined with any other antihypertensive drug (in fixed-dose combinations or in different medicinal products); ARBs includes current users of any angiotensin II receptor blocker (ARB), alone or combined with any other antihypertensive drug different from ACEIs (in fixed-dose combinations or in different medicinal products); AAs Includes current users of any antagonist of aldosterone, alone or combined with any other antihypertensive drug different from ACEIs and ARBs (in fixed-dose combinations or in different medicinal products); OADs includes calcium channel blockers, diuretics, beta-blockers, and alpha-blockers, alone or combined (excluding RAAS inhibitors, either in fixed-dose combinations or in different medicinal products).

**Appendix p 11. Risk of COVID-19 requiring hospital admission and current use of Renin-Angiotensin System (RAS) inhibitors as compared to current use of other antihypertensive drugs (OADs) (main analysis).** In this analysis, aldosterone antagonists (AAs) and renin inhibitors (RIs) are not included among RAAS inhibitors.

| Antihypertensive drug use            | Cases (%)<br>N=1139 | Controls (%)<br>N=11390 | Crude OR* (95%CI) | Adjusted OR** (95%CI) |
|--------------------------------------|---------------------|-------------------------|-------------------|-----------------------|
| <b>Current use of OADs***</b>        | 155 (13.6)          | 1129 (9.9)              | 1 (Ref.)          | 1 (Ref.)              |
| <b>Current use of RAS inhibitors</b> | 477 (41.9)          | 3744 (32.9)             | 0.92 (0.75-1.11)  | 0.92 (0.76-1.12)      |
| <i>ACEIs</i>                         | 240 (21.1)          | 2192 (19.2)             | 0.78 (0.63-0.97)  | 0.80 (0.64-1.00)      |
| Monotherapy                          | 82 (7.2)            | 757 (6.7)               | 0.75 (0.57-1.00)  | 0.83 (0.62-1.12)      |
| Combinations                         | 158 (13.9)          | 1435 (12.6)             | 0.80 (0.63-1.01)  | 0.78 (0.62-0.99)      |
| <i>ARBs</i>                          | 237 (20.8)          | 1552 (13.6)             | 1.11 (0.89-1.38)  | 1.10 (0.88-1.37)      |
| Monotherapy                          | 38 (3.3)            | 328 (2.9)               | 0.82 (0.56-1.20)  | 0.87 (0.60-1.28)      |
| Combinations                         | 199 (17.5)          | 1224 (10.8)             | 1.18 (0.94-1.48)  | 1.15 (0.92-1.45)      |
| <b>AAs</b>                           | 19 (1.7)            | 71 (0.6)                | 2.04 (1.20-3.49)  | 1.68 (0.97-2.91)      |
| <b>RIs</b>                           | 1 (0.1)             | 7 (0.1)                 | 1.08 (0.13-8.86)  | 1.04 (0.13-8.62)      |
| <b>Non-use</b>                       | 487 (42.8)          | 6439 (56.5)             | 0.47 (0.38-0.58)  | 0.55 (0.44-0.68)      |

\* Crude OR actually means adjusted only for the matching variables.

\*\* Adjusted for the matching variables plus antecedents of diabetes, dyslipidaemia, ischaemic heart disease, heart failure, atrial fibrillation, thromboembolic disease, cerebrovascular accident, chronic obstructive pulmonary disease, asthma, cancer and chronic renal failure.

**Abbreviations:** AAs: Antagonists of aldosterone; ACEIs: Angiotensin-converting enzyme inhibitors; ABs: Alpha-blockers; ARBs: Angiotensin II receptor blockers; BBAs: Beta-blocking agents; CCBs: Calcium-channel blockers; OADs: Other antihypertensive drugs; OR: Odds ratio; RAAS: Renin-Angiotensin-Aldosterone System; RIs: Renin inhibitors.

**Note:** In this table, the different pharmacological classes examined are mutually exclusive categories, so that patients who used combinations are counted only once, applying the following criteria: ACEIs includes current users of any angiotensin converting enzyme inhibitor, alone or combined with any other antihypertensive drug (in fixed-dose combinations or in different medicinal products); ARBs includes current users of any angiotensin II receptor blocker (ARB), alone or combined with any other antihypertensive drug different from ACEIs (in fixed-dose combinations or in different medicinal products); AAs Includes current users of any antagonist of aldosterone, alone or combined with any other antihypertensive drug different from ACEIs and ARBs (in fixed-dose combinations or in different medicinal products); OADs includes calcium channel blockers, diuretics, beta-blockers, and alpha-blockers, alone or combined (excluding RAAS inhibitors, either in fixed-dose combinations or in different medicinal products).

**Appendix p 12. Risk of COVID-19 requiring inpatient admission and current use of Renin-Angiotensin System (RAS) inhibitors as compared to current use of other antihypertensive drugs (OADs) by severity.** In this analysis, aldosterone antagonists (AAs) and renin inhibitors (RIs) are not included among RAAS inhibitors.

| Fatal and ICU cases       |                  |                      |                      |
|---------------------------|------------------|----------------------|----------------------|
|                           | Cases<br>(N=393) | Controls<br>(N=3930) | Adjusted OR* (95%CI) |
| Males                     | 264 (67.2)       | 2640 (67.2)          | Matched              |
| Age (y), mean ( $\pm$ SD) | 75.3 (12.3)      | 75.3 (12.3)          | Matched              |
| Current use of:           | ..               | ..                   | ..                   |
| <i>OADs</i> **            | 64 (16.3)        | 484 (12.3)           | 1 (Ref.)             |
| <i>RAS inhibitors</i> *** | 206 (52.4)       | 1560 (39.7)          | 1.06 (0.78-1.44)     |
| <i>ACEIs</i>              | 101 (25.7)       | 905 (23.0)           | 0.92 (0.65-1.29)     |
| <i>ARBs</i>               | 105 (26.7)       | 655 (16.7)           | 1.25 (0.89-1.77)     |
| <i>Non-use</i>            | 114 (29.0)       | 1854 (47.2)          | 0.48 (0.34-0.69)     |

  

| Less severe cases         |                  |                      |                      |
|---------------------------|------------------|----------------------|----------------------|
| Current use of:           | Cases<br>(N=746) | Controls<br>(N=7460) | Adjusted OR* (95%CI) |
| Males                     | 431 (57.8)       | 4310 (57.8)          | Matched              |
| Age (y), mean ( $\pm$ SD) | 65.8 (15.9)      | 65.8 (15.9)          | Matched              |
| Current use of:           | ..               | ..                   | ..                   |
| <i>OADs</i> **            | 91 (12.2)        | 645 (8.7)            | 1 (Ref.)             |
| <i>RAS inhibitors</i> *** | 271 (36.3)       | 2184 (29.3)          | 0.84 (0.65-1.09)     |
| <i>ACEIs</i>              | 139 (18.6)       | 1287 (17.3)          | 0.74 (0.56-0.99)     |
| <i>ARBs</i>               | 132 (17.7)       | 897 (12.0)           | 0.99 (0.74-1.33)     |
| <i>Non-use</i>            | 373 (50.0)       | 4585 (61.5)          | 0.57 (0.43-0.75)     |

\* Adjusted for the matching variables plus antecedents of diabetes, dyslipidaemia, ischaemic heart disease, heart failure, atrial fibrillation, thromboembolic disease, cerebrovascular accident, chronic obstructive pulmonary disease, asthma, cancer and chronic renal failure

\*\* Including calcium channel blockers, beta-blocking agents, diuretics and alpha-blockers

\*\*\* Including ACEIs and ARBs

**Abbreviations:** ACEIs: Angiotensin-converting enzyme inhibitors; ARBs: Angiotensin II receptor blockers; OADs: Other anti-hypertensive drugs; OR: Odds ratio; RAAS: Renin-Angiotensin-Aldosterone System.

**Note:** In this table, the different pharmacological classes examined are mutually exclusive categories, so that patients who used combinations are counted only once, applying the following criteria: ACEIs include current users of any angiotensin converting enzyme inhibitor, alone or combined with any other antihypertensive drug (in fixed-dose combinations or in different medicinal products); ARBs include current users of any angiotensin II receptor blocker (ARB), alone or combined with any other antihypertensive drug different from ACEIs (in fixed-dose combinations or in different medicinal products); OADs include calcium channel blockers, diuretics, beta-blockers, and alpha-blockers, alone or combined (excluding RAAS inhibitors, either in fixed-dose combinations or in different medicinal products).

**Appendix p 13. Comorbidity pattern associated with different antihypertensive drugs use, as well as non-use (of any antihypertensive drug), among controls.**

|                                 | <b>RAAS inhibitors<br/>(N=3828)</b> | <b>ACEIs<br/>(N=2192)</b> | <b>ARBs<br/>(N=1552)</b> | <b>OADs<br/>(N=1129)</b> | <b>CCBs<br/>(N=372)</b> | <b>Non-users<br/>(N=6439)</b> |
|---------------------------------|-------------------------------------|---------------------------|--------------------------|--------------------------|-------------------------|-------------------------------|
| <b>Male</b>                     | 2427 (63·5)                         | 1472 (67·2)               | 908 (58·5)               | 660 (58·5)               | 191 (65·2)              | 3863 (60·0)                   |
| <b>Age (y), mean (± SD)</b>     | 76·0 (10·3)                         | 75·5 (10·4)               | 76·5 (10·0)              | 77·8 (10·1)              | 78·6 (10·2)             | 63·4 (16·3)                   |
| <b>Hypertension</b>             | 3486 (91·2)                         | 1986 (90·6)               | 1451 (93·5)              | 823 (72·9)               | 314 (84·4)              | 1335 (20·7)                   |
| <b>Diabetes</b>                 | 1258 (32·9)                         | 698 (31·8)                | 532 (34·3)               | 283 (25·1)               | 91 (24·5)               | 770 (12·0)                    |
| <b>Dyslipidaemia</b>            | 2158 (56·5)                         | 1236 (56·4)               | 887 (57·2)               | 538 (47·7)               | 202 (54·3)              | 834 (13·0)                    |
| <b>Ischaemic heart disease</b>  | 510 (13·3)                          | 299 (13·6)                | 194 (12·5)               | 169 (15·0)               | 57 (15·3)               | 183 (2·8)                     |
| <b>Heart failure</b>            | 252 (6·6)                           | 117 (5·3)                 | 109 (7·0)                | 85 (7·5)                 | 23 (6·2)                | 63 (1·0)                      |
| <b>Atrial fibrillation</b>      | 492 (12·9)                          | 257 (11·7)                | 199 (12·8)               | 267 (23·6)               | 68 (18·3)               | 211 (3·3)                     |
| <b>Thromboembolic disease</b>   | 126 (3·3)                           | 72 (3·3)                  | 49 (3·2)                 | 45 (4·0)                 | 18 (4·8)                | 119 (1·9)                     |
| <b>Cerebrovascular accident</b> | 279 (7·3)                           | 144 (6·6)                 | 123 (7·9)                | 97 (8·6)                 | 40 (10·8)               | 193 (3·0)                     |
| <b>COPD</b>                     | 421 (11·0)                          | 232 (10·6)                | 176 (11·3)               | 145 (12·8)               | 45 (12·1)               | 357 (5·5)                     |
| <b>Asthma</b>                   | 221 (5·8)                           | 108 (4·9)                 | 107 (6·9)                | 68 (6·0)                 | 26 (7·0)                | 341 (5·3)                     |
| <b>Cancer</b>                   | 663 (17·4)                          | 375 (17·1)                | 274 (17·7)               | 216 (19·1)               | 80 (21·5)               | 694 (10·8)                    |
| <b>Chronic Renal Failure</b>    | 344 (9·0)                           | 169 (7·7)                 | 162 (10·4)               | 117 (10·4)               | 50 (13·4)               | 112 (1·7)                     |

**Abbreviations:** SD: Standard Deviation; COPD: Chronic obstructive pulmonary disease; RAAS: Renin-Angiotensin-Aldosterone System; ACEIs: Angiotensin-converting enzyme inhibitors; ARBs: Angiotensin II receptor blockers; CCBs: Calcium-channel blockers; OADs: other antihypertensive drugs.
